# Supplementary material for: Using Trait-Based Methods to Study the Response of Grassland to Fertilization in the Grassland in Semiarid Areas in the Loess Plateau of China
Source: MDPI journal article supplement (doi:10.3390/plants11152045), 2022-08-04
Supplement: s1 [file s1]

**Table S1** Relative biomass (%) of the six species under different N and P addition additions (mean  $\pm$  s.e.; n = 3).

| N            | P   | <i>B. ischaemum</i> | <i>L. davurica</i> | <i>S. bungeana</i> | <i>A. sacrorum</i> | <i>P. tanacetifolia</i> | <i>A. scoparia</i> |
|--------------|-----|---------------------|--------------------|--------------------|--------------------|-------------------------|--------------------|
| N0           | P0  | 27.30 $\pm$ 7.54    | 11.70 $\pm$ 2.34   | 12.67 $\pm$ 1.64   | 11.70 $\pm$ 5.99   | 16.36 $\pm$ 8.94        | 5.39 $\pm$ 2.23    |
|              | P20 | 24.78 $\pm$ 11.75   | 40.41 $\pm$ 9.92   | 5.50 $\pm$ 3.44    | 1.71 $\pm$ 1.25    | 5.49 $\pm$ 1.43         | 5.64 $\pm$ 2.13    |
|              | P40 | 9.96 $\pm$ 4.39     | 46.83 $\pm$ 5.47   | 4.65 $\pm$ 1.05    | 0.72 $\pm$ 0.72    | 12.59 $\pm$ 4.19        | 8.27 $\pm$ 2.21    |
|              | P80 | 19.42 $\pm$ 2.46    | 47.78 $\pm$ 1.70   | 6.53 $\pm$ 4.17    | 1.46 $\pm$ 1.46    | 4.04 $\pm$ 2.45         | 4.44 $\pm$ 1.43    |
| N25          | P0  | 40.22 $\pm$ 4.92    | 10.70 $\pm$ 2.61   | 16.39 $\pm$ 2.30   | 8.01 $\pm$ 2.54    | 8.48 $\pm$ 6.26         | 2.21 $\pm$ 0.91    |
|              | P20 | 50.09 $\pm$ 4.51    | 16.43 $\pm$ 0.92   | 8.03 $\pm$ 1.98    | 7.48 $\pm$ 6.55    | 5.61 $\pm$ 2.30         | 2.96 $\pm$ 1.39    |
|              | P40 | 31.05 $\pm$ 8.18    | 21.59 $\pm$ 0.73   | 6.09 $\pm$ 0.40    | 12.45 $\pm$ 6.30   | 4.57 $\pm$ 2.80         | 10.22 $\pm$ 4.67   |
|              | P80 | 25.73 $\pm$ 14.35   | 24.16 $\pm$ 12.04  | 10.28 $\pm$ 1.02   | 10.74 $\pm$ 6.58   | 4.68 $\pm$ 4.68         | 6.29 $\pm$ 1.80    |
| N50          | P0  | 36.16 $\pm$ 8.39    | 9.36 $\pm$ 5.15    | 27.54 $\pm$ 11.68  | 14.03 $\pm$ 6.62   | 3.03 $\pm$ 0.83         | 6.59 $\pm$ 2.94    |
|              | P20 | 28.79 $\pm$ 10.35   | 19.06 $\pm$ 2.71   | 11.12 $\pm$ 6.62   | 13.63 $\pm$ 6.88   | 0.21 $\pm$ 0.21         | 11.68 $\pm$ 6.09   |
|              | P40 | 33.09 $\pm$ 7.53    | 23.07 $\pm$ 2.85   | 8.11 $\pm$ 2.47    | 8.19 $\pm$ 4.93    | 3.58 $\pm$ 1.30         | 8.68 $\pm$ 5.30    |
|              | P80 | 34.02 $\pm$ 5.14    | 15.50 $\pm$ 3.91   | 14.61 $\pm$ 3.75   | 6.86 $\pm$ 1.80    | 5.47 $\pm$ 0.67         | 10.78 $\pm$ 1.67   |
| N100         | P0  | 38.80 $\pm$ 8.19    | 12.93 $\pm$ 6.31   | 27.38 $\pm$ 18.99  | 6.72 $\pm$ 4.36    | 1.96 $\pm$ 1.09         | 8.56 $\pm$ 3.90    |
|              | P20 | 34.54 $\pm$ 4.40    | 2.80 $\pm$ 1.28    | 5.65 $\pm$ 2.44    | 31.71 $\pm$ 3.97   | 3.68 $\pm$ 0.33         | 13.70 $\pm$ 6.85   |
|              | P40 | 40.03 $\pm$ 3.30    | 4.96 $\pm$ 1.62    | 3.07 $\pm$ 2.19    | 19.90 $\pm$ 3.96   | 3.37 $\pm$ 1.73         | 20.33 $\pm$ 8.23   |
|              | P80 | 38.51 $\pm$ 2.46    | 3.19 $\pm$ 0.78    | 3.70 $\pm$ 0.79    | 30.70 $\pm$ 4.44   | 1.49 $\pm$ 1.12         | 17.88 $\pm$ 1.54   |
| N            |     | ** (8.25)           | *** (9.43)         | ns                 | ** (10.28)         | ns                      | * (7.23)           |
| P            |     | ns                  | ** (7.23)          | * (8.58)           | ns                 | ns                      | * (5.64)           |
| N $\times$ P |     | * (24.71)           | * (14.70)          | ns                 | ** (14.08)         | ns                      | ns                 |

Note: Data in brackets are LSD values among different N and P addition treatments ( $p \leq 0.05$ ). \*, \*\* and \*\*\* indicate statistically significantly different at  $p \leq 0.05$ ,  $p \leq 0.01$ , and  $p \leq 0.001$ , respectively. ns, means no significant difference. Same as following.

**Table S2** Analysis of variance results ( $F$  values) for the effects of N addition (N), P addition (P), species and their interactions on leaf trait and maximum plant height ( $H_{\max}$ ). ns, \*, \*\* and \*\*\* indicated non-significant, significant at  $p < 0.05$ , 0.01 and 0.001, respectively.

| Factors         | LN<br>(g kg <sup>-1</sup> ) | LP<br>(g kg <sup>-1</sup> ) | LN:P      | SLA<br>(cm <sup>2</sup> g <sup>-1</sup> ) | LTD<br>(g cm <sup>-3</sup> ) | LDMC<br>(g g <sup>-1</sup> ) | $H_{\max}$<br>(cm) |
|-----------------|-----------------------------|-----------------------------|-----------|-------------------------------------------|------------------------------|------------------------------|--------------------|
| N               | 16.50***                    | 11.89***                    | 27.81***  | 7.05***                                   | 12.18***                     | 0.42ns                       | 19.06***           |
| P               | 1.15ns                      | 80.17***                    | 107.43*** | 4.28**                                    | 6.17***                      | 1.19ns                       | 1.82ns             |
| Species         | 81.25***                    | 59.97***                    | 48.41***  | 85.48***                                  | 64.15***                     | 23.37***                     | 95.16***           |
| N * P           | 2.05*                       | 3.64***                     | 1.50ns    | 0.13ns                                    | 1.33ns                       | 0.57ns                       | 2.41*              |
| N * Species     | 2.08*                       | 2.48**                      | 2.78**    | 1.26ns                                    | 1.33ns                       | 1.27ns                       | 3.91***            |
| P * Species     | 1.14ns                      | 3.50ns                      | 2.83**    | 0.58ns                                    | 2.50**                       | 1.88*                        | 1.01ns             |
| N * P * Species | 0.74ns                      | 2.44***                     | 1.07ns    | 0.50ns                                    | 1.12ns                       | 0.74ns                       | 0.88ns             |

**Table S3** Community weighted leaf traits, maximum plant height ( $H_{\max}$ ) and community aboveground biomass under different N and P addition additions (mean  $\pm$  s.e.; n = 3).

| N            | P   | CWM_LN<br>(g kg <sup>-1</sup> ) | CWM_LP<br>(g kg <sup>-1</sup> ) | CWM_LN:P         | CWM_SLA<br>(cm <sup>2</sup> g <sup>-1</sup> ) | CWM_LTD<br>(g cm <sup>-3</sup> ) | CWM_LDMC<br>(g g <sup>-1</sup> ) | CWM_ $H_{\max}$<br>(cm) | Community<br>AGB (g) |
|--------------|-----|---------------------------------|---------------------------------|------------------|-----------------------------------------------|----------------------------------|----------------------------------|-------------------------|----------------------|
| N0           | P0  | 17.49 $\pm$ 0.50                | 1.52 $\pm$ 0.05                 | 11.65 $\pm$ 0.28 | 173.23 $\pm$ 6.43                             | 0.46 $\pm$ 0.05                  | 0.42 $\pm$ 0.00                  | 34.90 $\pm$ 7.20        | 153.72 $\pm$ 9.64    |
|              | P20 | 20.67 $\pm$ 2.08                | 2.11 $\pm$ 0.31                 | 10.38 $\pm$ 1.24 | 175.91 $\pm$ 14.62                            | 0.39 $\pm$ 0.02                  | 0.48 $\pm$ 0.04                  | 35.25 $\pm$ 7.06        | 198.41 $\pm$ 5.89    |
|              | P40 | 22.70 $\pm$ 0.83                | 3.13 $\pm$ 0.34                 | 8.56 $\pm$ 0.71  | 158.17 $\pm$ 8.93                             | 0.51 $\pm$ 0.04                  | 0.48 $\pm$ 0.02                  | 21.42 $\pm$ 2.25        | 204.75 $\pm$ 46.67   |
|              | P80 | 22.79 $\pm$ 0.65                | 3.17 $\pm$ 0.17                 | 7.67 $\pm$ 0.48  | 160.74 $\pm$ 8.50                             | 0.49 $\pm$ 0.08                  | 0.45 $\pm$ 0.03                  | 23.99 $\pm$ 3.16        | 237.81 $\pm$ 36.19   |
| N25          | P0  | 20.78 $\pm$ 0.89                | 1.34 $\pm$ 0.06                 | 16.14 $\pm$ 1.43 | 174.43 $\pm$ 20.99                            | 0.45 $\pm$ 0.06                  | 0.42 $\pm$ 0.02                  | 36.19 $\pm$ 6.75        | 205.07 $\pm$ 40.95   |
|              | P20 | 18.73 $\pm$ 1.30                | 2.35 $\pm$ 0.17                 | 8.31 $\pm$ 0.32  | 217.58 $\pm$ 40.82                            | 0.37 $\pm$ 0.07                  | 0.43 $\pm$ 0.02                  | 38.59 $\pm$ 3.89        | 316.72 $\pm$ 7.52    |
|              | P40 | 21.62 $\pm$ 0.43                | 2.64 $\pm$ 0.23                 | 8.82 $\pm$ 0.62  | 200.00 $\pm$ 18.42                            | 0.36 $\pm$ 0.03                  | 0.40 $\pm$ 0.00                  | 43.52 $\pm$ 1.23        | 333.80 $\pm$ 32.18   |
|              | P80 | 20.90 $\pm$ 1.62                | 2.90 $\pm$ 0.23                 | 7.84 $\pm$ 1.55  | 183.41 $\pm$ 18.76                            | 0.41 $\pm$ 0.06                  | 0.43 $\pm$ 0.02                  | 28.31 $\pm$ 6.92        | 320.92 $\pm$ 43.76   |
| N50          | P0  | 19.58 $\pm$ 0.93                | 1.20 $\pm$ 0.13                 | 16.97 $\pm$ 1.22 | 151.73 $\pm$ 15.21                            | 0.49 $\pm$ 0.01                  | 0.46 $\pm$ 0.02                  | 43.56 $\pm$ 9.73        | 293.11 $\pm$ 49.60   |
|              | P20 | 21.19 $\pm$ 1.14                | 1.97 $\pm$ 0.15                 | 11.28 $\pm$ 0.44 | 186.09 $\pm$ 7.14                             | 0.41 $\pm$ 0.04                  | 0.42 $\pm$ 0.00                  | 46.20 $\pm$ 4.28        | 382.02 $\pm$ 27.09   |
|              | P40 | 20.60 $\pm$ 2.50                | 2.63 $\pm$ 0.31                 | 8.28 $\pm$ 0.38  | 220.30 $\pm$ 17.51                            | 0.38 $\pm$ 0.03                  | 0.39 $\pm$ 0.02                  | 52.29 $\pm$ 3.97        | 409.46 $\pm$ 43.98   |
|              | P80 | 21.04 $\pm$ 0.77                | 3.05 $\pm$ 0.14                 | 7.82 $\pm$ 0.45  | 201.09 $\pm$ 8.62                             | 0.41 $\pm$ 0.01                  | 0.41 $\pm$ 0.02                  | 50.72 $\pm$ 9.08        | 493.34 $\pm$ 54.42   |
| N100         | P0  | 22.52 $\pm$ 1.08                | 1.39 $\pm$ 0.20                 | 17.83 $\pm$ 2.21 | 173.38 $\pm$ 33.87                            | 0.50 $\pm$ 0.10                  | 0.44 $\pm$ 0.04                  | 41.91 $\pm$ 12.09       | 259.73 $\pm$ 18.30   |
|              | P20 | 24.71 $\pm$ 1.47                | 2.13 $\pm$ 0.13                 | 11.96 $\pm$ 0.44 | 224.56 $\pm$ 9.75                             | 0.31 $\pm$ 0.02                  | 0.38 $\pm$ 0.01                  | 69.43 $\pm$ 5.21        | 655.73 $\pm$ 46.60   |
|              | P40 | 24.53 $\pm$ 2.38                | 2.71 $\pm$ 0.23                 | 9.63 $\pm$ 0.58  | 250.66 $\pm$ 18.69                            | 0.31 $\pm$ 0.01                  | 0.38 $\pm$ 0.01                  | 56.07 $\pm$ 0.92        | 647.16 $\pm$ 28.70   |
|              | P80 | 24.11 $\pm$ 0.56                | 2.65 $\pm$ 0.09                 | 9.63 $\pm$ 0.34  | 224.63 $\pm$ 3.67                             | 0.30 $\pm$ 0.02                  | 0.38 $\pm$ 0.01                  | 76.14 $\pm$ 4.72        | 956.31 $\pm$ 44.71   |
| N            |     | *(1.88)                         | ns                              | *(1.72)          | ns                                            | ns                               | ns                               | **(12.90)               | *** (91.1)           |
| P            |     | ns                              | *** (0.32)                      | *** (1.40)       | ** (20.46)                                    | ** (0.05)                        | ns                               | ns                      | *** (66.4)           |
| N $\times$ P |     | ns                              | ns                              | *(2.79)          | ns                                            | ns                               | ns                               | *(18.83)                | *** (137.3)          |
